# Supplementary material for: Risk of extrapyramidal symptoms associated with antipsychotic drugs in children and adolescents: a systematic review and meta-analysis of double-blind randomised placebo-controlled trials
Source: Research Square preprint supplement (doi:10.21203/rs.3.rs-9601341/v1), 2026-05-25
Supplement: Supplementary file 1 [file dff6998643a473cd4e1f2c1f.docx]

**Supplementary Information**

**Fig. S1** Cochrane Risk-of-Bias (RoB) 2 assessment


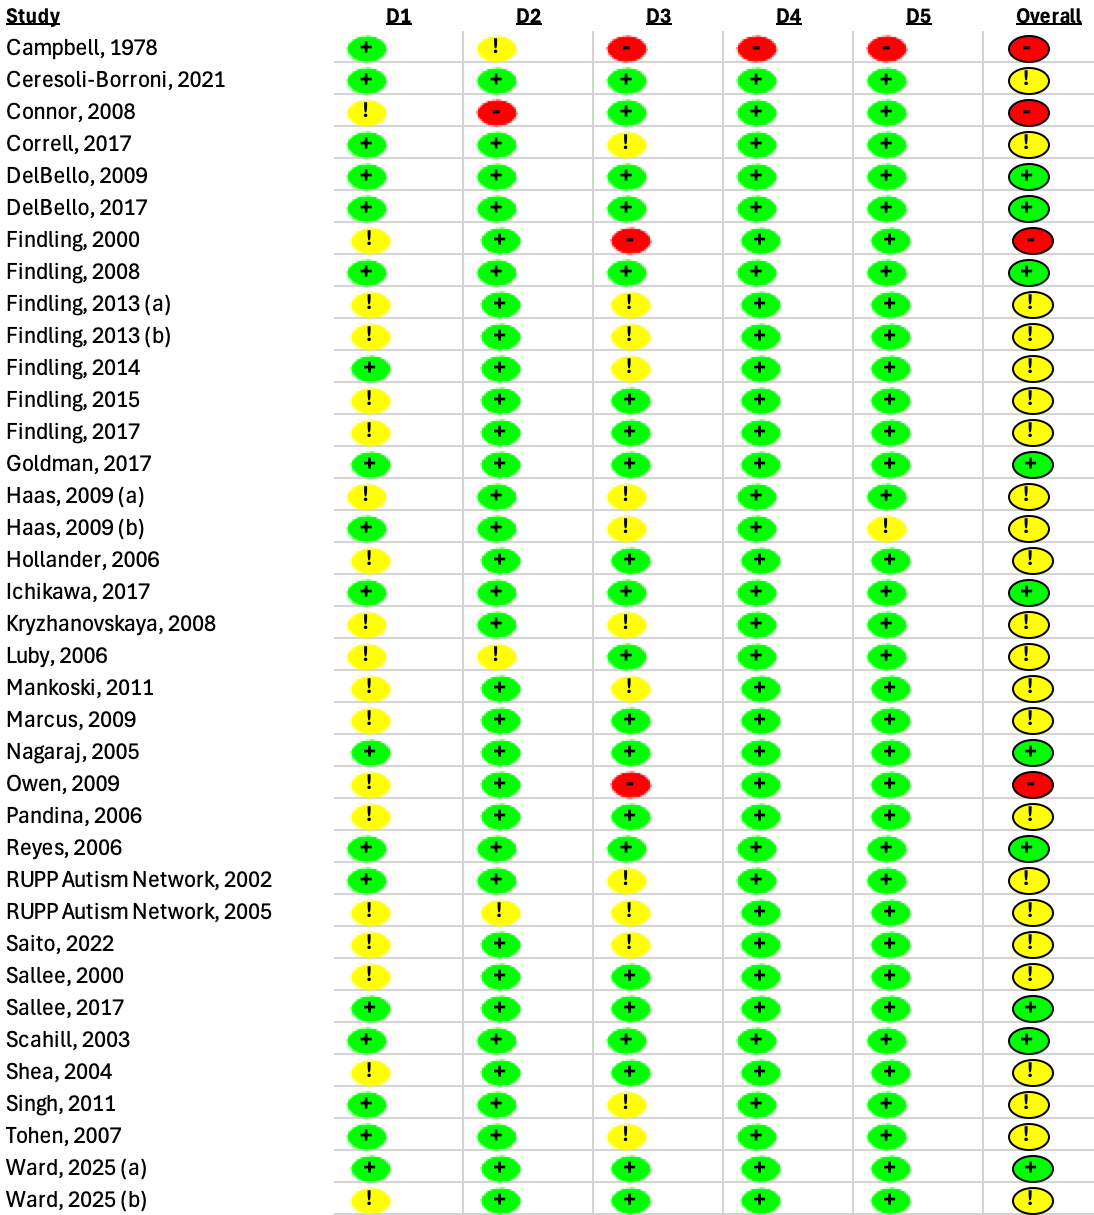


D1 Randomisation process; D2 Deviations from the intended interventions; D3 Missing outcomes data; D4 Measurement of the outcome; D5 Selection of the reported results. +: Low risk; !: Some concerns; -: High risk

**Fig. S2** Risk of extrapyramidal symptoms in children and adolescents by antipsychotic agent

**
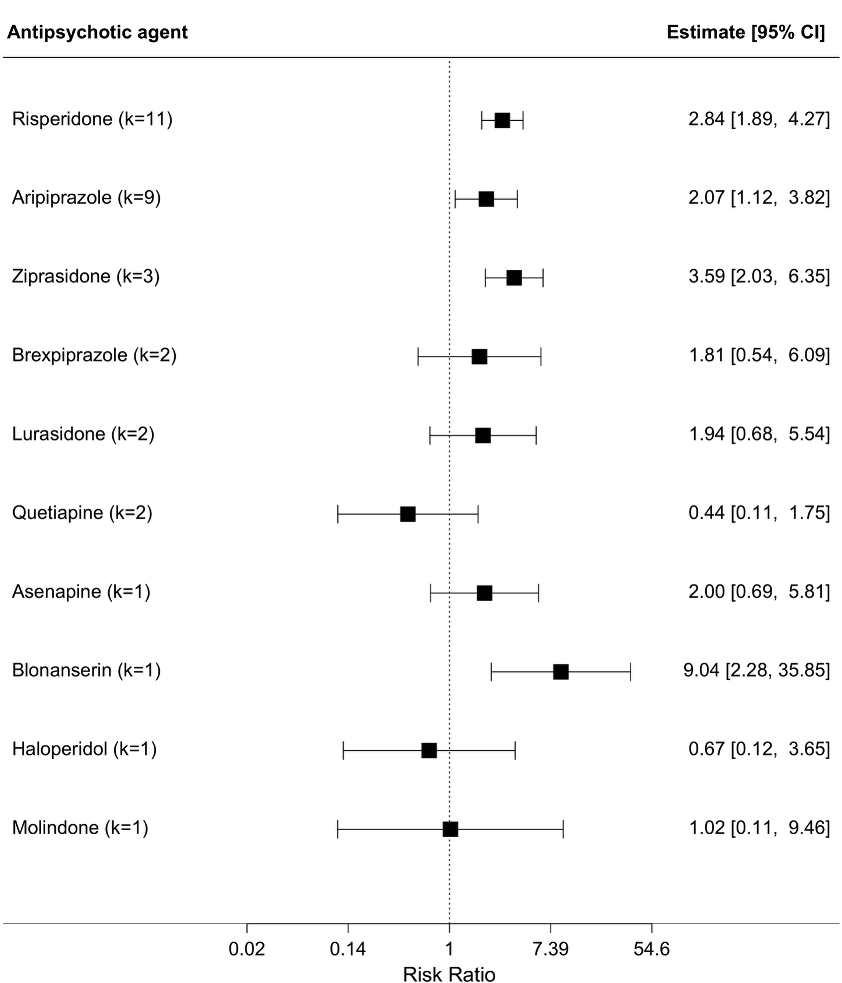
**

**Fig. S3** Risk of extrapyramidal symptoms in children and adolescents by diagnosis


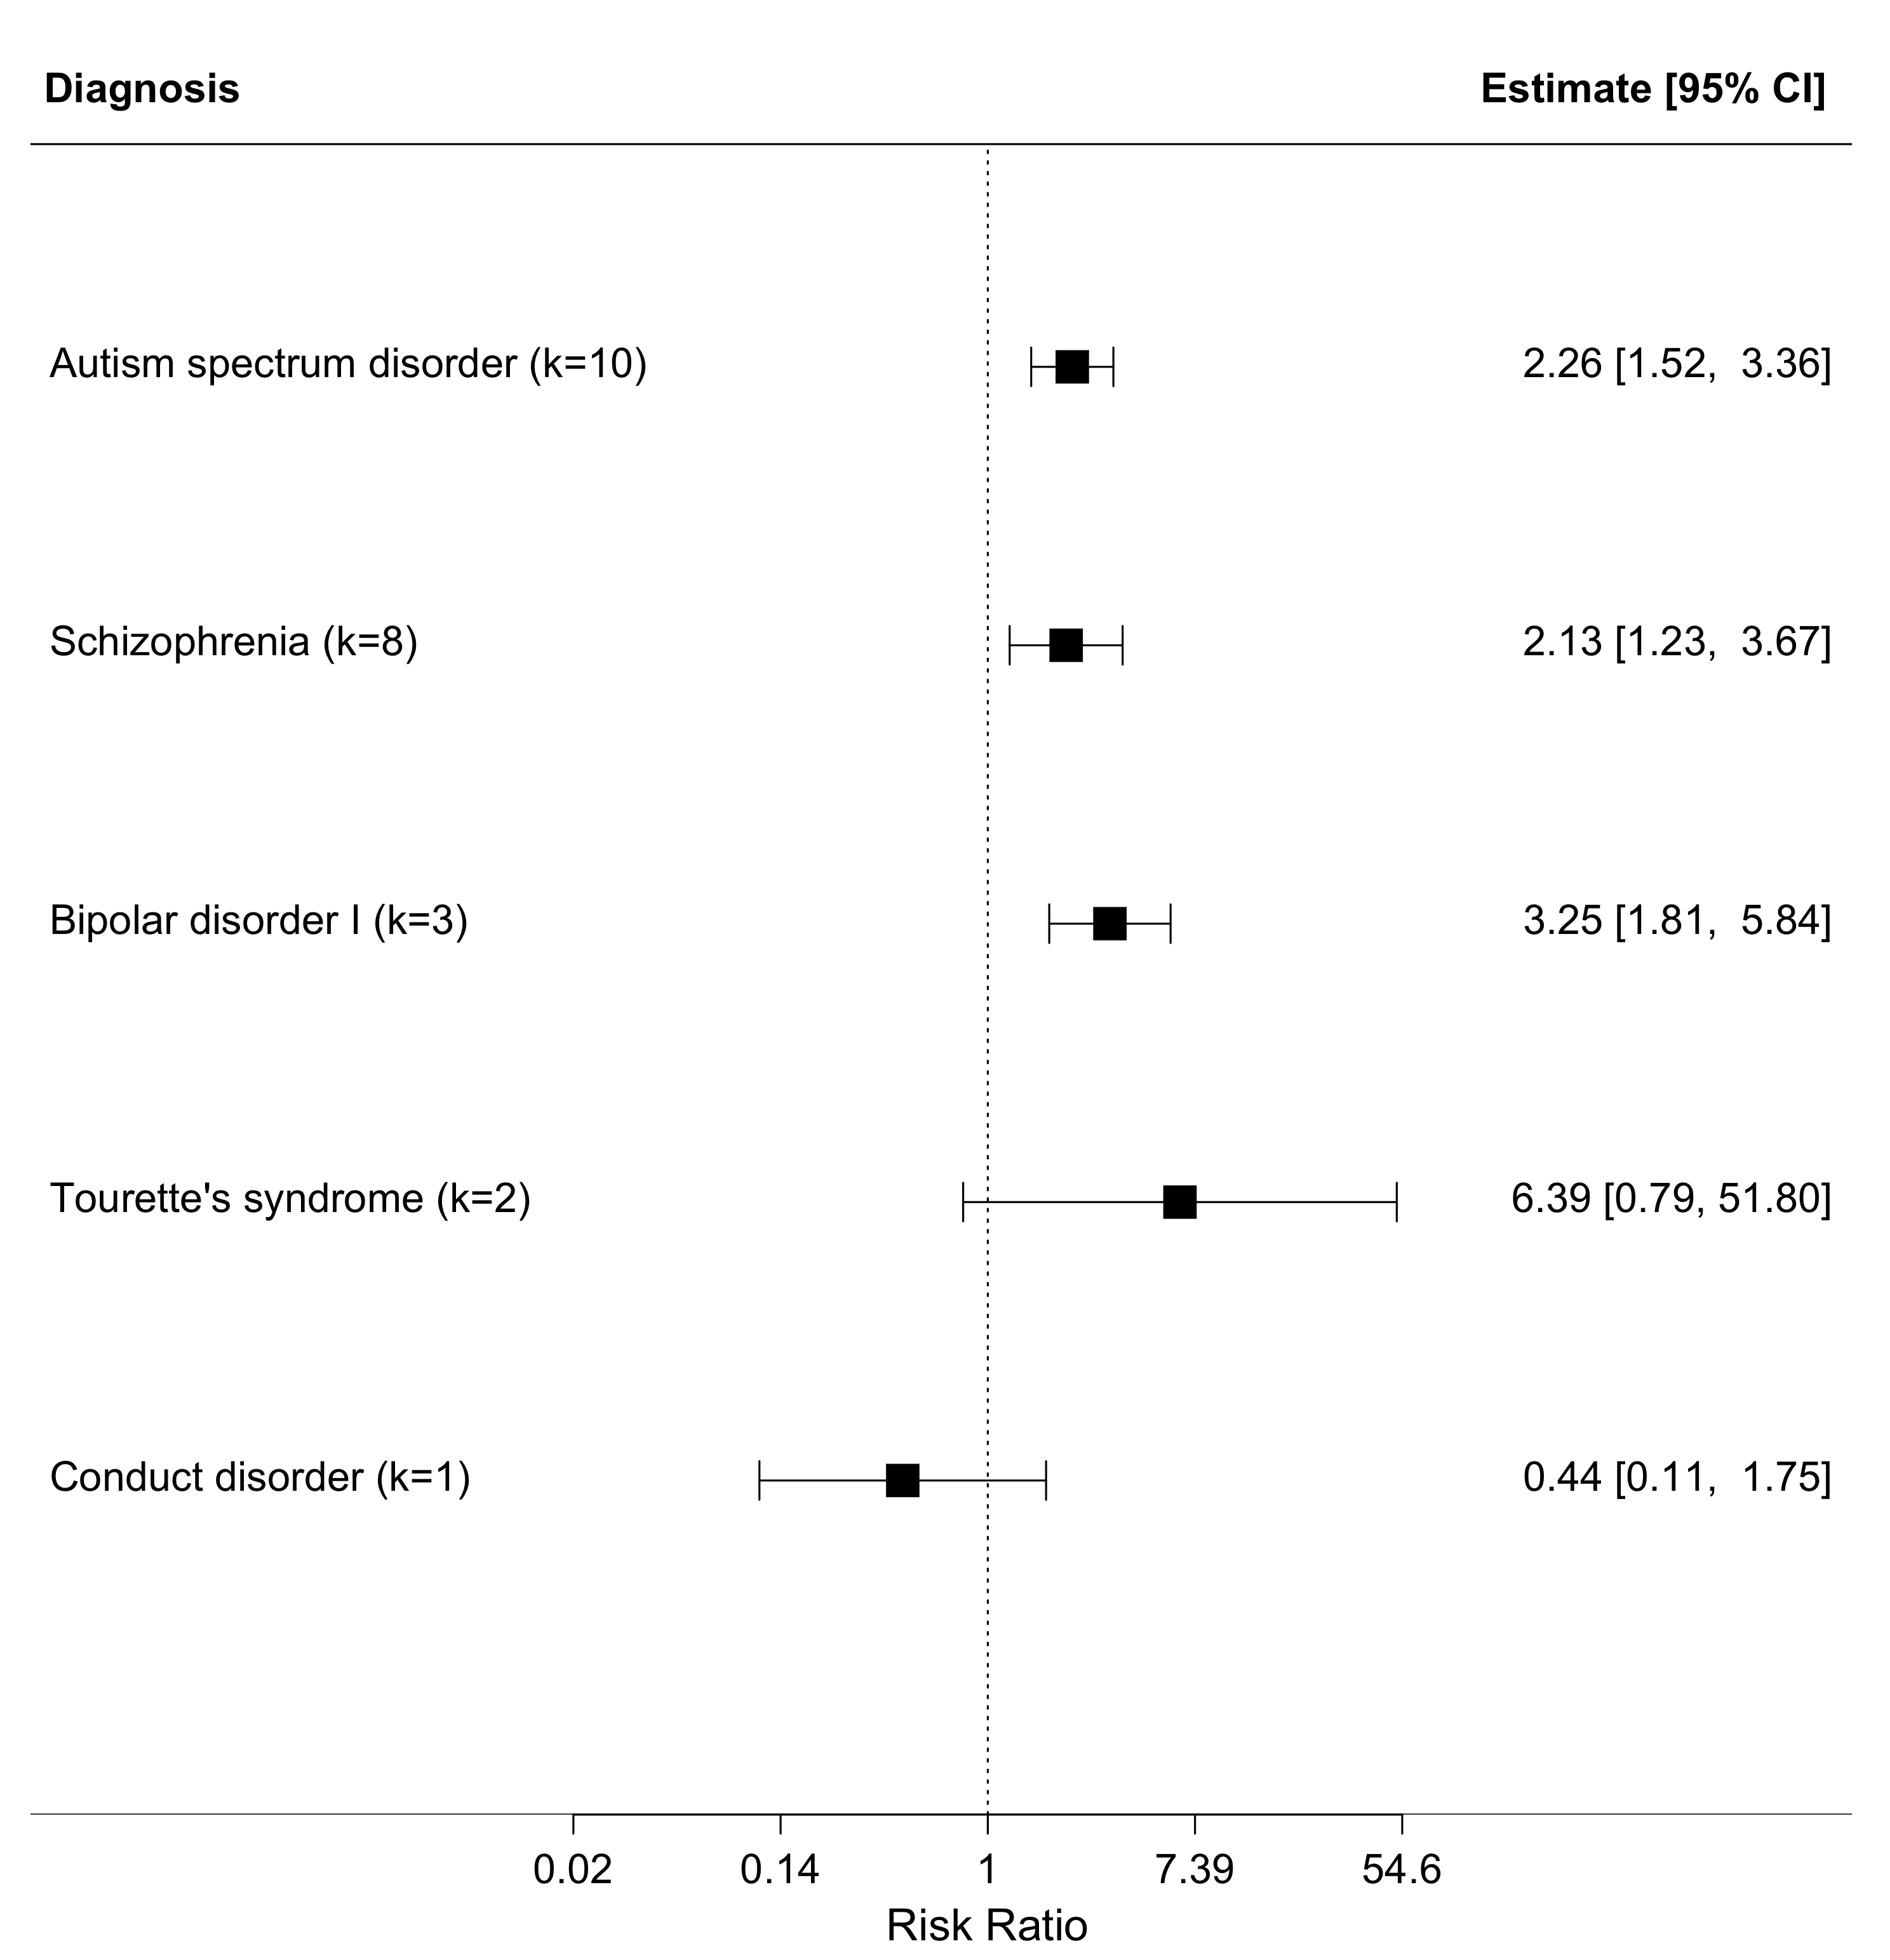


**Fig. S4** Risk of extrapyramidal symptoms in children and adolescents by concomitant medication (other than antipsychotics)

**
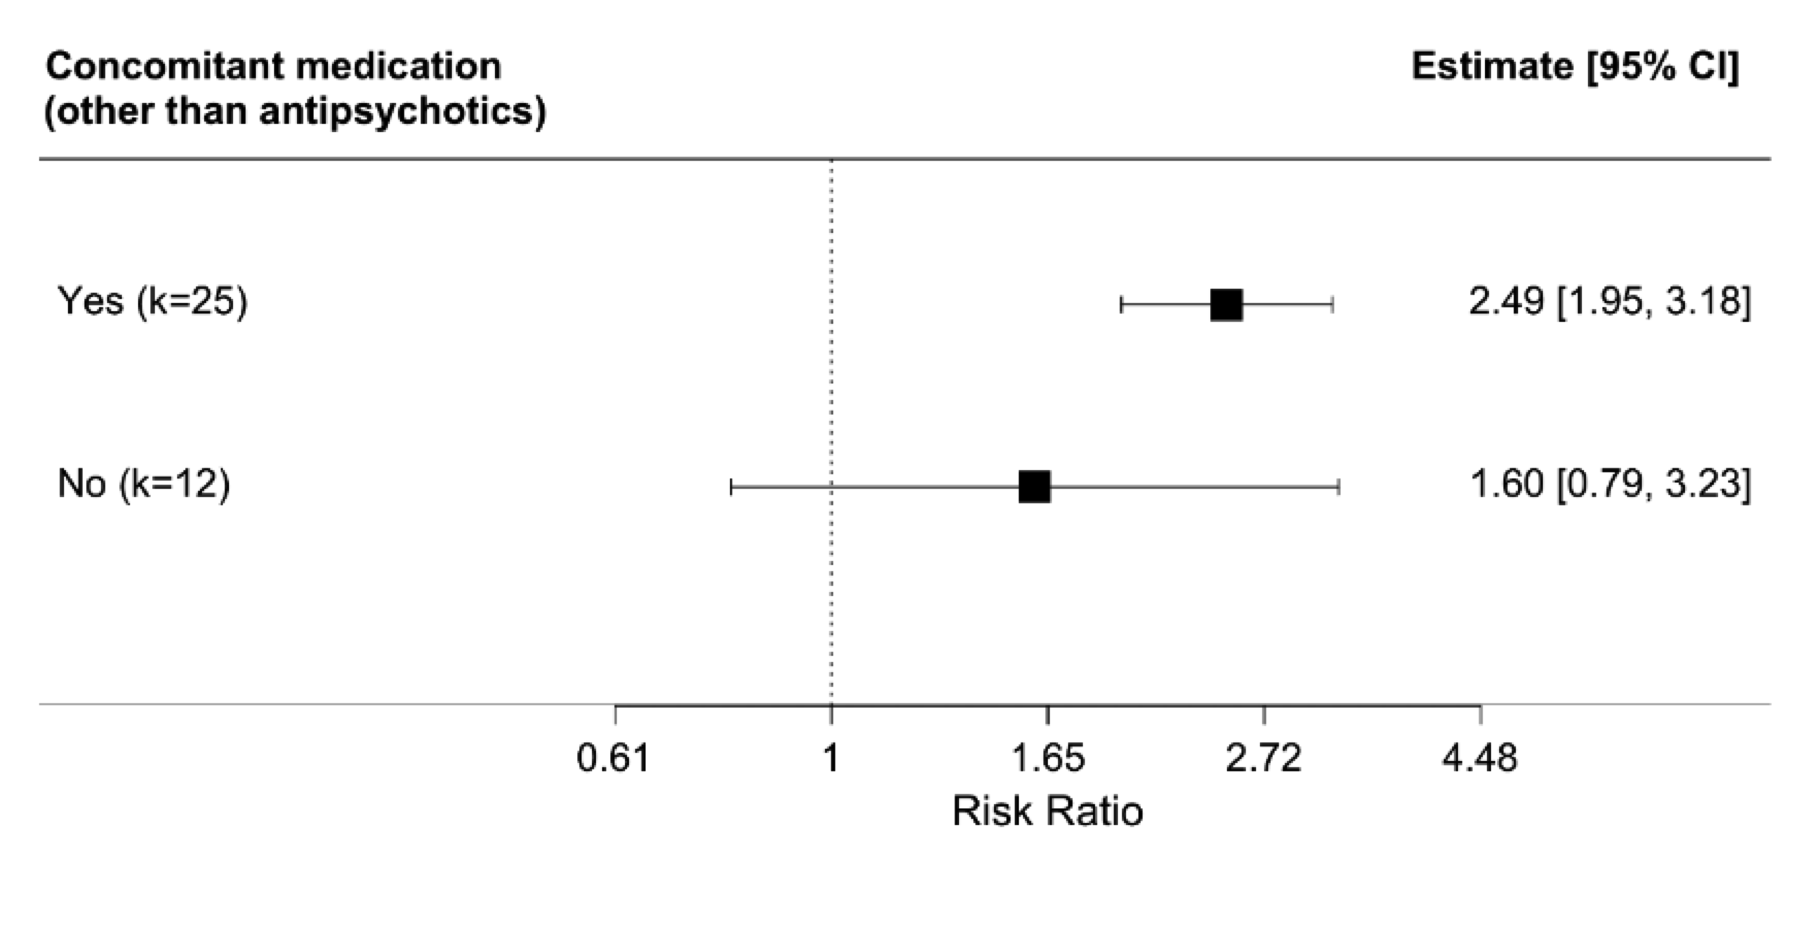
**

**Supplementary Text**

**Search strategy.** (Antipsychotic* OR Anti-psychotic* OR Neurolept* OR Acepromazine OR Acetophenazine OR Amisulpride OR Aripiprazole OR Asenapine OR Benperidol OR Blonanserin OR Brexpiprazole OR Bromperidol OR Butaperazine OR Cariprazine OR Carpipramine OR Chlorproethazine OR Chlorpromazine OR Chlorprothixene OR Clocapramine OR Clopenthixol OR Clopentixol OR Clotiapine OR Clozapine OR Cyamemazine OR Cyamepromazine OR Dixyrazine OR Droperidol OR Fluanisone OR Fluphenazine OR Flupenthixol OR Flupentixol OR Fluphenazine OR Fluspirilen OR Fluspirilene OR Haloperidol OR Iloperidone OR Levomepromazine OR Levosulpiride OR Loxapine OR Lurasidone OR Melperone OR Mepazine OR Mesoridazine OR Methotrimeprazine OR Molindone OR Moperone OR Mosapramine OR Olanzapine OR Oxypertine OR Paliperidone OR Penfluridol OR Perazine OR Periciazine OR Pericyazine OR Perospirone OR Perphenazine OR Pimozide OR Pipamperone OR Pipothiazine OR Pipotiazine OR Prochlorperazine OR Promazine OR Promethazine OR Propericiazine OR Prothipendyl OR Quetiapine OR Remoxipride OR Reserpine OR Risperidone OR Sertindole OR Sulpiride OR Sultopride OR Thiopropazate OR Thioproperazine OR Thioridazine OR Thiothixene OR Tiapride OR Tiaspirone OR Tiosperone OR Tiospirone OR Tiotixene OR Trifluoperazine OR Trifluperidol OR Triflupromazine OR Trifluoperazine OR Veralipride OR Ziprasidone OR Zotepine OR Zuclopenthixol OR Zuclopentixol) AND (child* OR kid OR kids OR adolesce* OR teen* OR minor* OR juvenil* OR youth* OR pediatric* OR paediatric* OR boy OR girl) AND (random*[Title/Abstract] OR "clinical trial"[Title/Abstract]).

**Extrapyramidal symptoms definition.** Parkinsonism comprises hypokinetic motor features such as tremor, rigidity, bradykinesia or hypokinesia, akinesia, motor slowing, impaired gait, postural instability, reduced facial expression or speech, and glabellar tap, and may also include broader gait or postural abnormalities. Dyskinesia refers to hyperkinetic involuntary movements, including orofacial dyskinesias (e.g., grimacing, lip smacking, pursing or puckering, chewing or biting movements, tongue protrusion or “fly-catching”) as well as chorea or athetoid movements affecting the neck, head, shoulders, trunk, pelvis, respiratory muscles, and upper or lower extremities, such as limb hyperkinesia, knee movements, foot tapping, heel dropping, squirming, inversion/eversion, trunk rocking or twisting, and pelvic gyrations. Dystonia is characterized by sustained or intermittent muscle contractions producing abnormal postures or repetitive twisting movements, which may involve the eyes (e.g., blepharospasm, oculogyric crises), face (grimacing), jaw (clenching or bruxism), tongue, larynx (hoarseness or choked voice), pharynx, neck (head turning), trunk, or limbs, and may present as acute or tardive forms. Akathisia is defined by subjective inner restlessness accompanied by observable motor restlessness, often manifesting as an inability to remain still or repetitive movements. Where reported in the original trials, additional related manifestations—such as restlessness, abnormal movements, postural abnormalities, or broader gait disturbances—were also considered within the spectrum of EPS.

**Extrapyramidal symptoms assessment.** Validated scales: Abnormal Involuntary Movement Scale (AIMS), Barnes Akathisia Rating Scale (BARS), Drug-Induced Extrapyramidal Symptoms Scale (DIEPSS), Extrapyramidal Symptoms Rating Scale (ESRS), and the Simpson–Angus Scale (SAS); Not validated scales:Dosage Record and Treatment-Emergent Symptom Scale (DOTES).
